# Supplementary material
Source: PubMed Central journal article supplement (PMC9559839)

**BC-Predict study pathway**

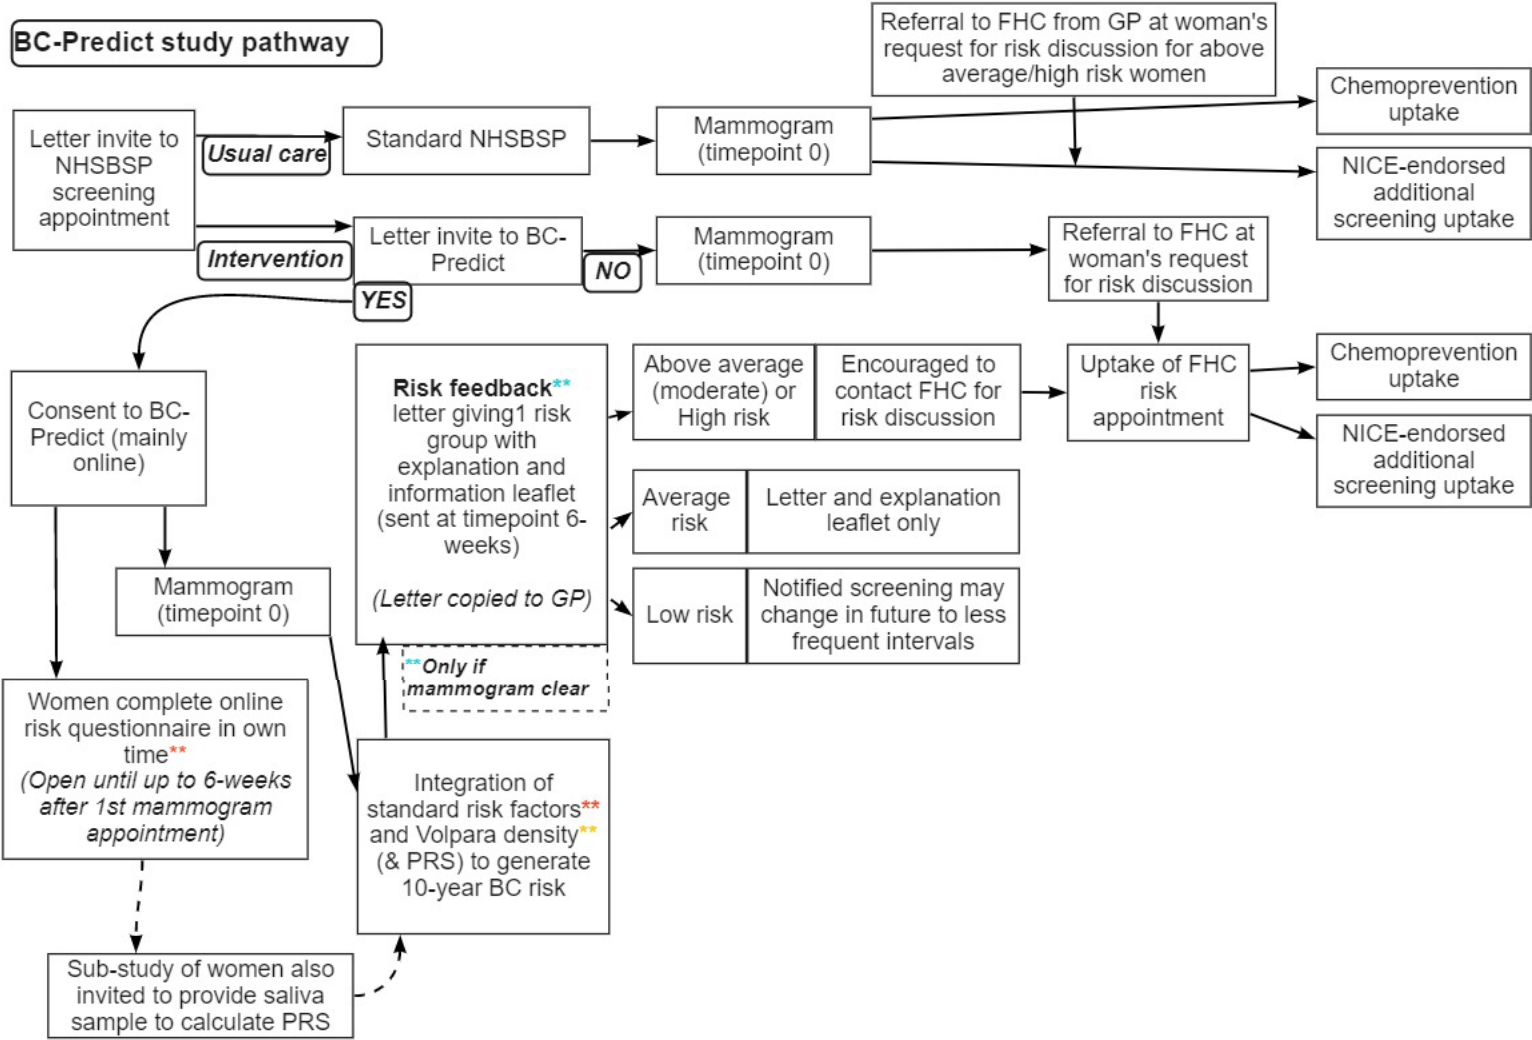

Supplement: 12885_2022_10134_MOESM2_ESM.pdf [file 12885_2022_10134_MOESM2_ESM.pdf]
